# Supplementary material for: Off-stoichiometric Na3−3xV2+x(PO4)3/C nanocomposites as cathode materials for high-performance sodium-ion batteries prepared by high-energy ball milling
Source: Royal Society of Chemistry journal article supplement (doi:10.1039/c8ra02843e), 2018-01-01
Supplement: c8ra02843e1.pdf [file c8ra02843e1.pdf]

# Off-stoichiometric $\text{Na}_{3-3x}\text{V}_{2+x}(\text{PO}_4)_3/\text{C}$ Nanocomposites as Cathode Materials for High-performance Sodium-ion Batteries Prepared by High-energy Ball Milling

Pingping Sun<sup>1</sup>, Yuanting Wang<sup>1</sup>, Xiuzhen Wang<sup>1</sup>, Qingyu Xu<sup>1,2,\*</sup>, Qi Fan<sup>3,\*</sup>,

Yueming Sun<sup>3</sup>

<sup>1</sup> School of Physics, Southeast University, Nanjing 211189, China

<sup>2</sup> National Laboratory of Solid State Microstructures, Nanjing University, Nanjing  
210093, China

<sup>3</sup> College of Chemistry and Chemical Engineering, Southeast University, Nanjing  
211189, China

Keywords: off-stoichiometry,  $\text{Na}_3\text{V}_2(\text{PO}_4)_3$ , sodium-ion battery

\* Corresponding author: [xuqingyu@seu.edu.cn](mailto:xuqingyu@seu.edu.cn); [fanqi1984@126.com](mailto:fanqi1984@126.com)

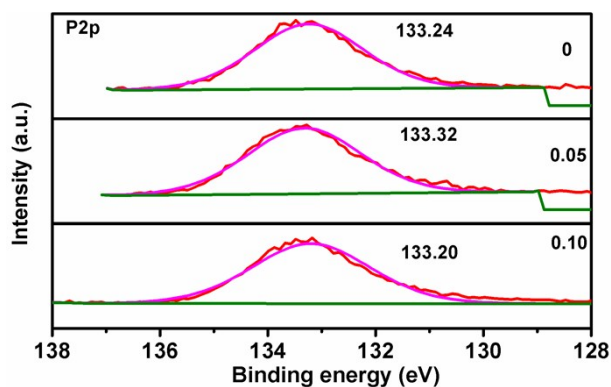

**Fig. S1.** P2p XPS spectra of NVP- $x$  ( $x=0-0.10$ ).

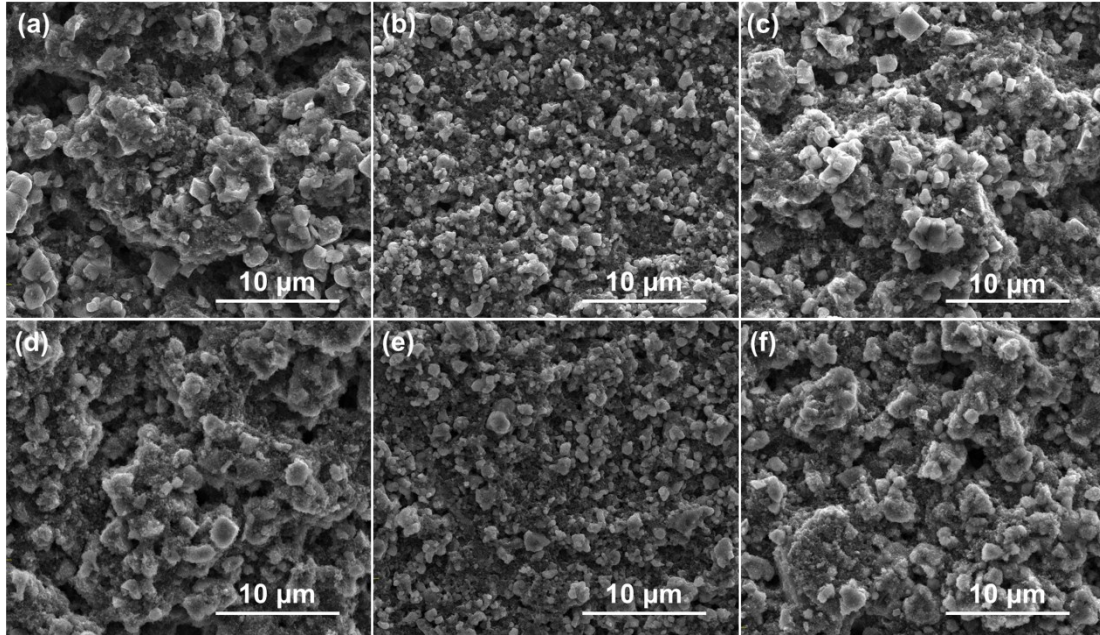

**Fig. S2.** SEM images of the NVP- $x$  electrode before cycling (a) NVP-0, (b) NVP-0.05, (c) NVP-0.10; after 100 cycles at 1 C (d) NVP-0, (e) NVP-0.05, (f) NVP-0.10.

SEM experiments were done to compare the morphological changes of the NVP- $x$  electrodes before cycling and after 100 cycles at 1 C. As shown in Fig. S2 (Supporting Information), there is no apparent difference between the SEM images of the electrode before cycling and after 100 cycles at 1 C. Before cycling, a compact electrode consisting of the NVP- $x$  particles and acetylene black are observed. After 100 cycles at 1 C, the electrodes still maintain integral. Thus, the results suggested that the structures of NVP- $x$  are stable and the amorphous carbons are helpful to assist in buffering volume change of Na ion insertion/extraction.
